# Supplementary material
Source: PubMed Central journal article supplement (PMC3928641)
Supplement: mmc1.pdf [file mmc1.pdf]

**Table S1: Description of CVI cohort**

| Person | In manuscript | Age at examination in years (+ months when under 4 years) | Gender | Gestational age (weeks) | Intellectual disability/ developmental delay | NGS (platform)          |
|--------|---------------|-----------------------------------------------------------|--------|-------------------------|----------------------------------------------|-------------------------|
| CVI1   | Individual 1  | 12                                                        | M      | 42                      | +                                            | + (Illumina Hiseq 2000) |
| CVI2   |               | 3+8                                                       | M      | 42                      | +                                            | + (Illumina Hiseq 2000) |
| CVI3   |               | 1+7                                                       | M      | At term                 | +                                            | + (Illumina Hiseq 2000) |
| CVI4   |               | 21                                                        | M      | 40                      | +                                            | + (Illumina Hiseq 2000) |
| CVI5   |               | 12                                                        | M      | 37                      | +                                            | + (Illumina Hiseq 2000) |
| CVI6   |               | 11                                                        | F      | 42                      | +                                            | + (Illumina Hiseq 2000) |
| CVI7   |               | 8                                                         | M      | 40                      | +                                            | + (Illumina Hiseq 2000) |
| CVI8   |               | 7                                                         | M      | 38                      | +                                            | + (Illumina Hiseq 2000) |
| CVI9   |               | 7                                                         | F      | 41                      | +                                            | + (Illumina Hiseq 2000) |
| CVI10  |               | 7                                                         | M      | 38                      | +                                            | + (Illumina Hiseq 2000) |
| CVI11  | Individual 2  | 4                                                         | F      | 41                      | +                                            | + (SOLiD 5500XL)        |
| CVI12  |               | 4                                                         | F      | 40                      | +                                            | + (SOLiD 5500XL)        |
| CVI13  |               | 9                                                         | M      | 40                      | +                                            |                         |
| CVI14  | Individual 3  | 18                                                        | F      | At term                 | +                                            |                         |
| CVI15  | Individual 4  | 24                                                        | F      | 36                      | +                                            |                         |
| CVI16  |               | 3+7                                                       | M      | 37                      | +                                            |                         |
| CVI17  |               | 3+4                                                       | M      | 35                      | +                                            |                         |
| CVI18  |               | 2+10                                                      | M      | 41                      | +                                            |                         |
| CVI19  |               | 2+1                                                       | F      | 40                      | +                                            |                         |
| CVI20  |               | 1+6                                                       | M      | 37                      | +                                            |                         |
| CVI21  |               | 38                                                        | F      | At term                 | +                                            |                         |
| CVI22  |               | 36                                                        | M      | 42                      | +                                            |                         |
| CVI23  |               | 33                                                        | F      | At term                 | -                                            |                         |
| CVI24  |               | 33                                                        | M      | 41                      | +                                            |                         |
| CVI25  |               | 30                                                        | F      | 40                      | +                                            |                         |
| CVI26  |               | 29                                                        | M      | At term                 | +                                            |                         |
| CVI27  |               | 28                                                        | M      | At term                 | +                                            |                         |
| CVI28  |               | 28                                                        | F      | At term                 | +                                            |                         |
| CVI29  |               | 26                                                        | F      | At term                 | +                                            |                         |
| CVI30  |               | 26                                                        | M      | 39                      | +                                            |                         |
| CVI31  |               | 23                                                        | F      | 39                      | +                                            |                         |
| CVI32  |               | 22                                                        | F      | 42                      | +                                            |                         |
| CVI33  |               | 20                                                        | F      | 40                      | +                                            |                         |
| CVI34  |               | 18                                                        | M      | At term                 | +                                            |                         |
| CVI35  |               | 17                                                        | M      | 40                      | +                                            |                         |
| CVI36  |               | 17                                                        | M      | At term                 | -                                            |                         |
| CVI37  |               | 15                                                        | F      | 40                      | +                                            |                         |
| CVI38  |               | 15                                                        | M      | 42                      | +                                            |                         |
| CVI39  |               | 2                                                         | F      | 38                      | +                                            |                         |
| CVI40  |               | 14                                                        | M      | 32                      | -                                            |                         |
| CVI41  |               | 13                                                        | M      | 40                      | -                                            |                         |
| CVI42  |               | 13                                                        | F      | At term                 | +                                            |                         |
| CVI43  |               | 13                                                        | F      | 40                      | +                                            |                         |
| CVI44  |               | 12                                                        | M      | 42                      | +                                            |                         |
| CVI45  |               | 10                                                        | M      | 39                      | +                                            |                         |
| CVI46  |               | 9                                                         | M      | 40                      | +                                            |                         |
| CVI47  |               | 7                                                         | M      | 41                      | +                                            |                         |
| CVI48  |               | 7                                                         | F      | 40                      | +                                            |                         |
| CVI49  |               | 7                                                         | M      | 38                      | +                                            |                         |
| CVI50  |               | 6                                                         | M      | 41                      | +                                            |                         |
| CVI51  |               | 6                                                         | M      | 37                      | +                                            |                         |
| CVI52  |               | 6                                                         | M      | 37                      | +                                            |                         |
| CVI53  |               | 6                                                         | F      | At term                 | +                                            |                         |
| CVI54  |               | 5                                                         | M      | At term                 | +                                            |                         |
| CVI55  |               | 5                                                         | M      | 39                      | +                                            |                         |
| CVI56  |               | 4                                                         | F      | 36                      | +                                            |                         |

**Table S2: Pathogenicity prediction of the identified mutations in *NR2F1***

|                                | <b>Individual 1</b>      | <b>Individual 2</b>      | <b>Individual 3</b>      | <b>Individual 6</b>       |
|--------------------------------|--------------------------|--------------------------|--------------------------|---------------------------|
| <b>Coding DNA change</b>       | c.344G>C                 | c.339C>A                 | c.755T>C                 | c.335G>A                  |
| <b>Protein change</b>          | p.Arg115Pro              | p.Ser113Arg              | p.Leu252Pro              | p.Arg112Lys               |
| <b>PhyloP</b>                  | 5.05                     | 1.90                     | 4.56                     | 5.05                      |
| <b>Conservation down to</b>    | C. elegans               | C. elegans               | C. elegans               | C. elegans                |
| <b>Pholyphen2 (score)</b>      | Probably damaging (1.00) | Probably damaging (1.00) | Probably damaging (0.99) | Probably damaging (0.995) |
| <b>Sift (score)</b>            | Deleterious (0.00)       | Deleterious (0.00)       | Deleterious (0.00)       | Deleterious (0.00)        |
| <b>Mutation Taster (Score)</b> | Disease causing (0.99)   | Disease causing (0.99)   | Disease causing (0.99)   | Disease causing (0.99)    |
| <b>MutPred</b>                 | 0.888                    | 0.848                    | 0.939                    | 0.947                     |
| <b>EVS frequency</b>           | 0                        | 0                        | 0                        | 0                         |
| <b>dbSNP frequency</b>         | 0                        | 0                        | 0                        | 0                         |

**Table S3: Additional phenotype of the individuals in which a *NR2F1* defect was identified**

|                                      | Individual 1                                                                                      | Individual 2                                                                                                                                                                     | Individual 3                                                                                        | Individual 4                                                                 | Individual 5                                                                 | Individual 6                                                                                                   |
|--------------------------------------|---------------------------------------------------------------------------------------------------|----------------------------------------------------------------------------------------------------------------------------------------------------------------------------------|-----------------------------------------------------------------------------------------------------|------------------------------------------------------------------------------|------------------------------------------------------------------------------|----------------------------------------------------------------------------------------------------------------|
| <b>Gender</b>                        | M                                                                                                 | F                                                                                                                                                                                | F                                                                                                   | F                                                                            | F                                                                            | F                                                                                                              |
| <b>Birth weight (grams)</b>          | 3510 (p7)                                                                                         | 3855 (p70)                                                                                                                                                                       | 3780 (p70)                                                                                          | 2500 (p50)                                                                   | 4150 (p86)                                                                   | 2800 (p12)                                                                                                     |
| <b>Gestational age (weeks)</b>       | 42                                                                                                | 41                                                                                                                                                                               | AT                                                                                                  | 36                                                                           | 41                                                                           | 40                                                                                                             |
| <b>Age at investigations (years)</b> | 12                                                                                                | 2+4                                                                                                                                                                              | 18                                                                                                  | 24                                                                           | 4                                                                            | 35                                                                                                             |
| <b>Height (cm)</b>                   | 159 (p84)                                                                                         | 87 (p16)                                                                                                                                                                         | 185 (p99)                                                                                           | 170 (p50)                                                                    | 107 (p55)                                                                    | 158 (p21)                                                                                                      |
| <b>Dysmorphisms</b>                  | Protruding ears, long nostrils, prominent alae nasi, flattened thorax, long fingers and toes.     | Epicanthal folds, upturned nose point, broad mouth, full lips, simple protruding ears with upturned ear lobes, tapering fingers and fetal fingers pads, curly slow growing hair. | Upslanting palpebral fissures, small nasal ridge, retrognathia, high palate, long fingers and toes. | Tapering fingers, extra flexion crease dig IV right, II-III syndactyly toes. | Broad high nasal bridge, prominent antihelix of the ear, clinodactyly dig V. | Right helix incompletely folded. Prominent Darwin's tubercle on right ear. Pointed chin. Synophrys (familial). |
| <b>Hearing</b>                       | -                                                                                                 | -                                                                                                                                                                                | -                                                                                                   | -                                                                            | -                                                                            | -                                                                                                              |
| <b>Other abnormalities</b>           |                                                                                                   | Hypotonia.                                                                                                                                                                       | Hypotonia.                                                                                          | Neonatal feeding problems.                                                   | Neonatal feeding problems.                                                   | Mild slowing in rapid alternating movements. Mild spasticity.                                                  |
| <b>Refraction error</b>              | OD S+7.25=C-2.25x164"<br>OS S+6.75=C-1.75x30"                                                     | OD S+3<br>OS S+3                                                                                                                                                                 | OD S+0.25=C-0.50x4"<br>OS S-0.25=C-0.75x11"                                                         | OD S 0=C-1.00x111"<br>OS S-0.71=C-0.25x50"                                   | OD S+1.75<br>OS S+1.75                                                       | OD S-2.00=C+4.00x180"<br>OS S-2.00=C+4.00x180"                                                                 |
| <b>Correction of refraction</b>      | +                                                                                                 | -                                                                                                                                                                                | -                                                                                                   | +                                                                            | -                                                                            | -                                                                                                              |
| <b>Visual acuity OD</b>              | 0.06                                                                                              | ND                                                                                                                                                                               | 0.08                                                                                                | 0.08                                                                         | ND                                                                           | 0.1                                                                                                            |
| <b>Visual acuity OS</b>              | 0.03                                                                                              | ND                                                                                                                                                                               | 0.1                                                                                                 | 0.2                                                                          | ND                                                                           | 0.1                                                                                                            |
| <b>Visual acuity ODS</b>             | 0.125                                                                                             | 20/260 (0.08)                                                                                                                                                                    | 0.16                                                                                                | 0.25                                                                         | 0.2                                                                          | 0.1                                                                                                            |
| <b>Method (distance)</b>             | LH (3 m)                                                                                          | TAC (55 cm)                                                                                                                                                                      | Landolt C 2.6' (5 m)                                                                                | Landolt C 2.6' (5 m)                                                         | TAC (55 cm)                                                                  | Snellen                                                                                                        |
| <b>Strabismus</b>                    | +                                                                                                 | +                                                                                                                                                                                | +                                                                                                   | +                                                                            | +                                                                            | +                                                                                                              |
| <b>Oculomotor disturbance</b>        | -                                                                                                 | -                                                                                                                                                                                | +                                                                                                   | -                                                                            | +                                                                            | -                                                                                                              |
| <b>Nystagmus</b>                     | Latent.                                                                                           | -                                                                                                                                                                                | Latent.                                                                                             | Latent.                                                                      | Latent.                                                                      | -                                                                                                              |
| <b>Visual field defects</b>          | +                                                                                                 | +                                                                                                                                                                                | +                                                                                                   | -                                                                            | +                                                                            | ND                                                                                                             |
| <b>Slit lamp examination</b>         | Iris transillumination.                                                                           | -                                                                                                                                                                                | -                                                                                                   | Deep anterior chamber, mild lens opacity.                                    | Slight iris transillumination                                                | Bilateral keratoconus.                                                                                         |
| <b>Optic disc</b>                    | Small and large excavation.                                                                       | Pale.                                                                                                                                                                            | Pale and large excavation.                                                                          | Partial pale.                                                                | OD small and pale. OS pale and large excavation. Normal.                     | Pale.                                                                                                          |
| <b>Macula</b>                        | Not recognizable.                                                                                 | Normal.                                                                                                                                                                          | Normal.                                                                                             | Normal.                                                                      | Normal.                                                                      | Inner retinal atrophy with muted umbo and foveal light reflexes. ND                                            |
| <b>VEP (age)</b>                     | Flash: late response; pattern onset: late response; pattern reversal: normal responses (8 years). | Flash: long latency times (10 months).                                                                                                                                           | Flash:normal; pattern reversal: long latency (8 years).                                             | ND                                                                           | ND                                                                           | ND                                                                                                             |
| <b>ERG (age)</b>                     | Normal (8 years).                                                                                 | ND                                                                                                                                                                               | Normal (8 years).                                                                                   | Normal (11 years).                                                           | ND                                                                           | ND                                                                                                             |
| <b>Other ocular features</b>         | Crowding, fluctuating visual performance, excentric fixation.                                     |                                                                                                                                                                                  |                                                                                                     | Crowding.                                                                    |                                                                              | Keratitis sicca managed with punctal plugs OU.                                                                 |

ND = not done.

**Supplemental Table S4: Optic nerve abnormality cohort**

| Person | Variant identified       | Gender | Age (years)      | Disease                             |
|--------|--------------------------|--------|------------------|-------------------------------------|
| ONA1   | c.909G>C;<br>p.Gln303His | M      | 68               | OPA                                 |
| ONA2   |                          | V      | 68               | OPA                                 |
| ONA3   |                          | M      | 60               | OPA                                 |
| ONA4   |                          | V      | 39               | OPA                                 |
| ONA5   |                          | M      | 48               | OPA                                 |
| ONA6   |                          | M      | 46               | OPA                                 |
| ONA7   |                          | M      | 41               | OPA                                 |
| ONA7   |                          | M      | 74               | LHON                                |
| ONA8   |                          | M      | 69               | LHON                                |
| ONA9   |                          | M      | 64               | LHON                                |
| ONA10  |                          | V      | 63               | LHON                                |
| ONA11  |                          | M      | 63               | LHON                                |
| ONA12  |                          | M      | 58               | LHON                                |
| ONA13  |                          | M      | 57               | LHON                                |
| ONA14  |                          | V      | 56               | LHON                                |
| ONA15  |                          | V      | 56               | LHON                                |
| ONA16  |                          | M      | 53               | LHON                                |
| ONA17  |                          | M      | 52               | LHON                                |
| ONA18  |                          | M      | 52               | LHON                                |
| ONA19  |                          | V      | 51               | LHON                                |
| ONA20  |                          | M      | 51               | LHON                                |
| ONA21  |                          | V      | 47               | LHON                                |
| ONA22  |                          | M      | 45               | LHON                                |
| ONA23  |                          | M      | 44               | LHON                                |
| ONA24  |                          | V      | 38               | LHON                                |
| ONA25  |                          | M      | 34               | LHON                                |
| ONA26  |                          | M      | 33               | LHON                                |
| ONA27  |                          | V      | 25               | LHON                                |
| ONA28  |                          | M      | 25               | LHON                                |
| ONA29  |                          | V      | 21               | LHON                                |
| ONA30  |                          | M      | 13               | LHON                                |
| ONA31  |                          | M      | 13               | LHON                                |
| ONA32  |                          | V      | 9                | LHON                                |
| ONA33  |                          | M      | 50               | LHON                                |
| ONA34  |                          | M      | 3                | Opticopathy and developmental delay |
| ONA35  |                          | V      | 33               | Optic nerve abnormaliy              |
| ONA36  | V                        | 30     | OPA and deafness |                                     |

OPA = optic atrophy, LHON = Leber hereditary optic neuropathy.
